# Supplementary material for: PEGylated Polyethylenimine Derivative-Mediated Local Delivery of the shSmad3 Inhibits Intimal Thickening after Vascular Injury
Source: Hindawi journal article supplement (doi:10.1155/2019/8483765), 2019-07-29
Supplement: f1 [file 8483765.f1.docx]

**Supplementary Table 1**. Primer pairs used for quantitative real-time polymerase chain analysis in this study

| **Gene** | **Forward Sequence** | **Reverse Sequence** |
| --- | --- | --- |
| Smad3  Col I | 5’-GACGCCAGTTCTACCTCCTG-3’  5’-AGATGACGGAGAAGCTGGAA-3’ | 5’-CTCTCCATCTTCGCTCAGGT-3’  5’-CCATCCAAACCACTGAAACC-3’ |
| Col III | 5’-CTGGGGAAACATGCGTAAAC-3’ | 5’-TAAACTGAAAACCGCCATCC-3’ |
| MMP1 | 5’-AAAGGCCAGTATGCACAGCTTTC-3’ | 5’-TTCAACCACTGGGCCACTATTTC-3’ |
| MMP2 | 5’-GAAGAGCGTGAAGGTTGGAA-3’ | 5’-TATCAGGTGGGGGTGAGAAG-3’ |
| MMP9 | 5’-TGAGCTTTGACATCCTGCAC-3’ | 5’-TTTGTATCCGGCAAACTGGT-3’ |
| TIMP1 | 5’-TTCTCATCGCTGGACAACTG-3’ | 5’-AGCGTAGGTCTTGGTGAAGC-3’ |
| GAPDH | 5’-GCACCGTCAAGGCTGAGAAC-3’ | 5’-TGGTGAAGACGCCAGTGGA-3’ |
